# Supplementary material for: The contribution of joint and skin improvements to the health-related quality of life of patients with psoriatic arthritis: a post hoc analysis of two randomised controlled studies
Source: HighWire-hosted journal article supplement (doi:10.1136/annrheumdis-2018-215003), 2019-05-21
Supplement: annrheumdis-2018-215003supp001_data_supplement.pdf [file annrheumdis-2018-215003supp001_data_supplement.pdf]

## Supplement

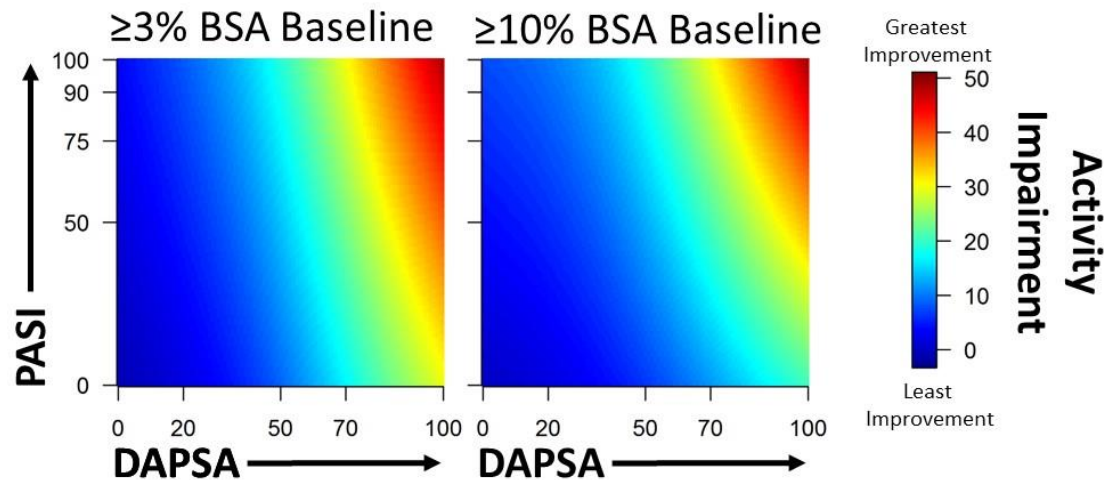

**Figure S1. Impact of joint and skin improvement on patient HRQoL as measured by WPAI-**

**Activity Impairment Domain.** Heat maps depict change from baseline in WPAI-Activity

Impairment Domain at Week 24, with a range from least improvement (blue) to greatest

improvement (red). Joint and skin improvements measured by percent improvements from

baseline PASI and DAPSA scores at Week 24, respectively. Patients with  $\geq 3\%$  and  $\geq 10\%$  baseline

BSA are depicted in the left and right panels, respectively. BSA=body surface area.

DAPSA=disease activity for psoriatic arthritis. HRQoL=health-related quality of life index. PASI=

Psoriasis Area and Severity Index Improvement. WPAI=Work Productivity and Activity

Impairment Questionnaire.

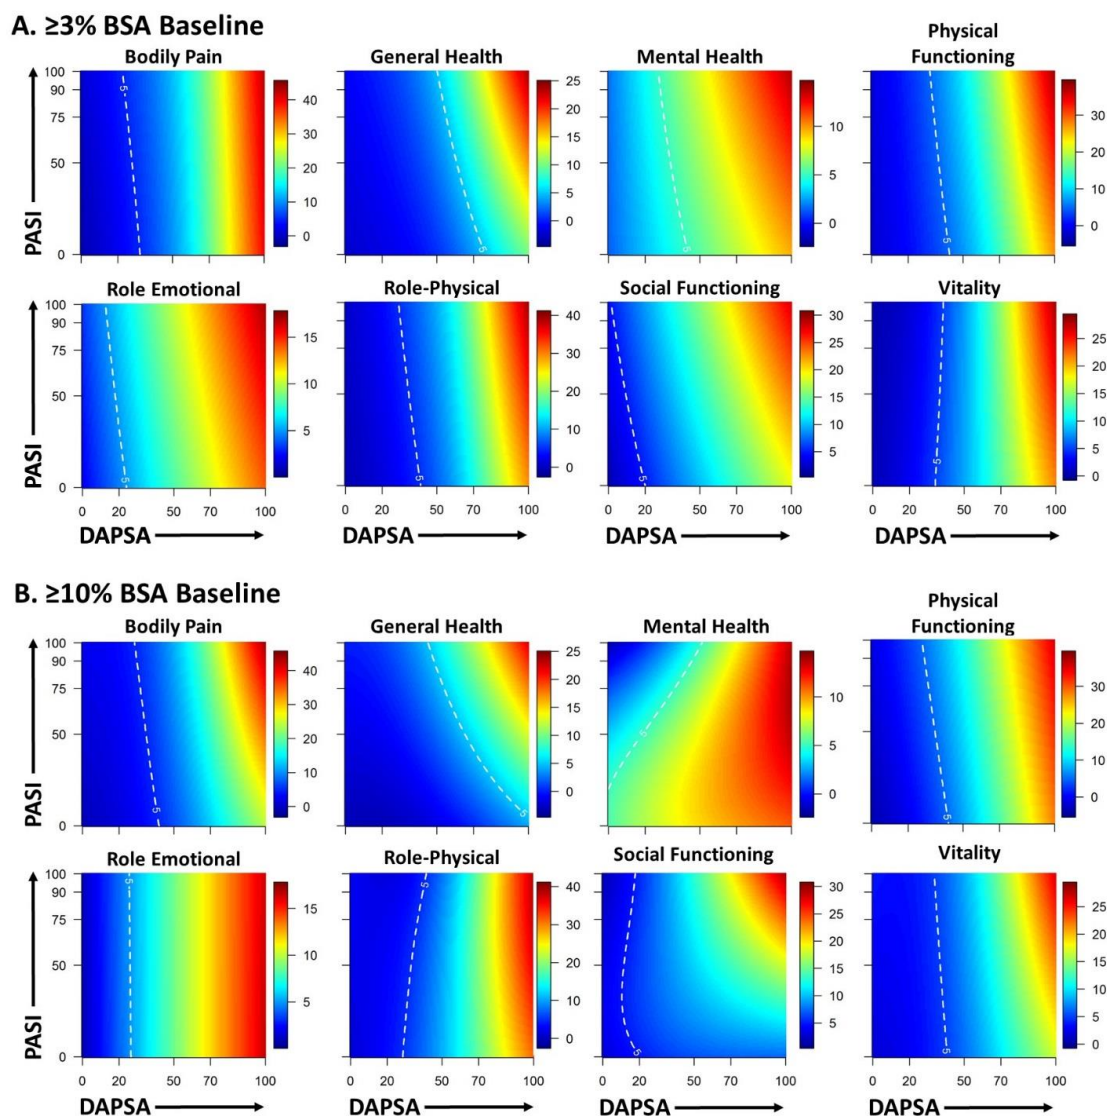

**Figure S2. Impact of joint and skin improvement on patient HRQoL as measured by SF-36**

**domains.** Data presented from patients with **(A)**  $\geq 3\%$  and **(B)**  $\geq 10\%$  baseline BSA. Heat maps depict data change from baseline in domains of SF-36 at Week 24, with a range from least improvement (blue) to greatest improvement (red). Joint and skin improvements measured by percent improvements from baseline PASI and DAPSA scores at Week 24, respectively. Minimal

clinically important differences (MCIDs; 5 point improvement from baseline) are highlighted for each domain (dashed lines). DAPSA=disease activity for psoriatic arthritis. HRQoL=health-related quality of life index. PASI= Psoriasis Area and Severity Index Improvement. SF-36=36-Item Short Form Health Survey.

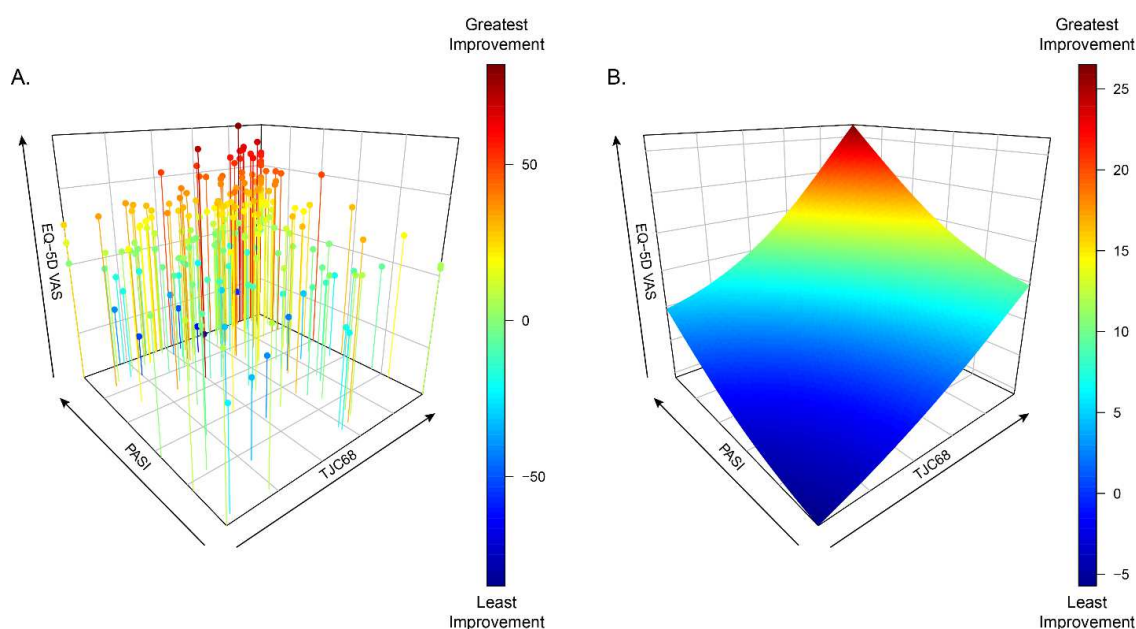

**Figure S3. Impact of joint and skin improvement on patient HRQoL as measured by Tender Joint Count (TJC68). (A)** Three dimensional scatterplot and **(B)** response surface of scatterplot estimated by smoothing spline method of skin (y-axis; PASI – percent improvement), joint (x-axis; TJC68 percent improvement), and HRQoL (z-axis; EQ-5D – change from baseline) improvement at Week 24. A color spectrum is applied to HRQoL (blue [least improvement] to red [greatest improvement]). DAPSA=disease activity for psoriatic arthritis. HRQoL=health-related quality of life index. EQ-5D=EuroQoL five dimensions questionnaire. PASI= Psoriasis Area and Severity Index. VAS=visual analog score.

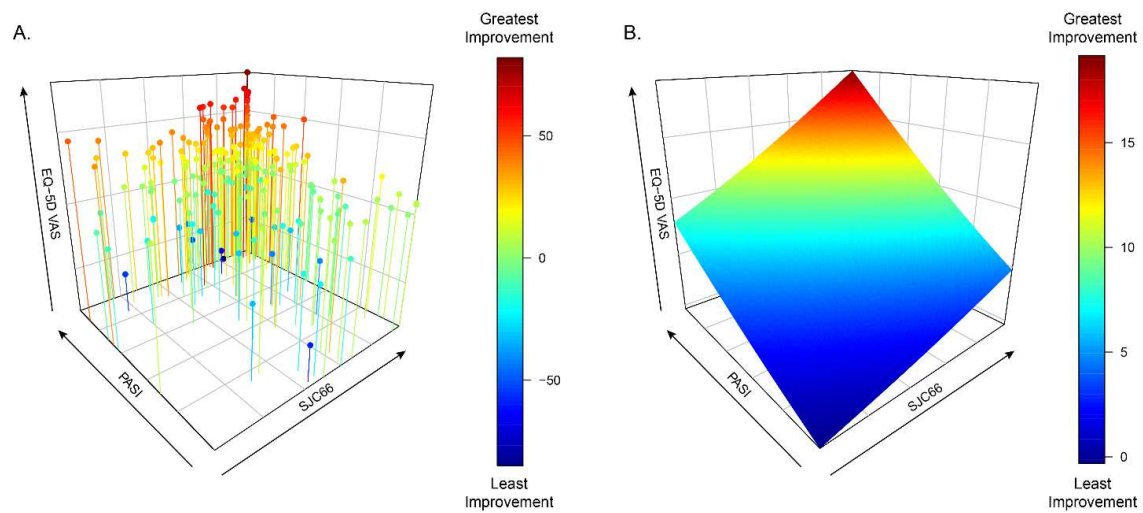

**Figure S4. Impact of joint and skin improvement on patient HRQoL as measured by Swollen Joint Count (SJC66). (A)** Three dimensional scatterplot and **(B)** response surface of scatterplot estimated by smoothing spline method of skin (y-axis; PASI – percent improvement), joint (x-axis; SJC66 percent improvement), and HRQoL (z-axis; EQ-5D – change from baseline) improvement at Week 24. A color spectrum is applied to HRQoL (blue [least improvement] to red [greatest improvement]). DAPSA=disease activity for psoriatic arthritis. HRQoL=health-related quality of life index. EQ-5D=EuroQoL five dimensions questionnaire. PASI= Psoriasis Area and Severity Index. VAS=visual analog score.
